# Supplementary material
Source: Springer Nature journal article supplement (https://www.springermedizin.de/resource/supplementary/12888_2013_1408_MOESM2_ESM.pdf/9480152)

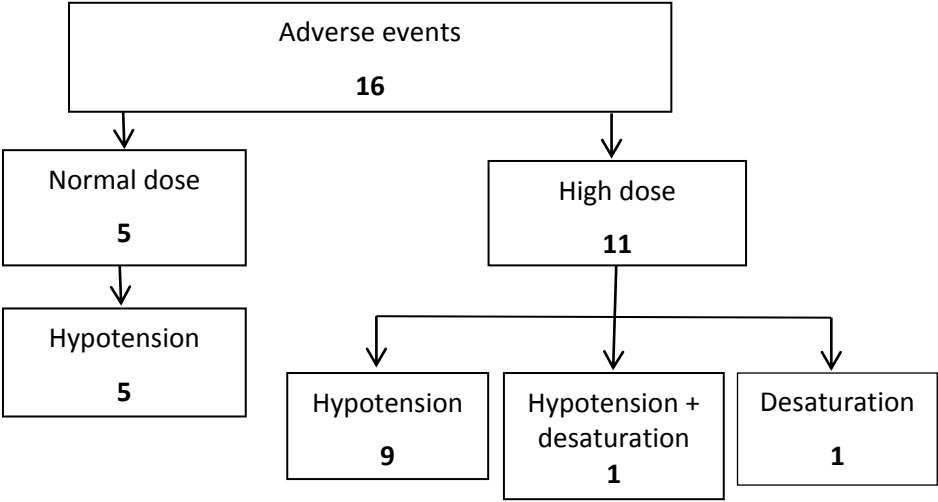

Supplement: MOESM2 [file 9480152]
